# Supplementary material for: Osmolyte Signatures for the Protection of Aspergillus sydowii Cells under Halophilic Conditions and Osmotic Shock
Source: MDPI journal article supplement (doi:10.3390/jof7060414), 2021-05-26
Supplement: s1 [file s1]

## Supplementary Material

# Osmolyte Signatures for the Protection of *Aspergillus sydowii* cells under Halophilic Conditions and Osmotic Shock

Eya Caridad Rodríguez-Pupo <sup>1,2,†</sup>, Yordanis Pérez-Llano <sup>1,2,†</sup>, José Raunel Tinoco-Valencia <sup>3</sup>, Norma Silvia Sánchez <sup>4</sup>, Francisco Padilla-Garfias <sup>4</sup>, Martha Calahorra <sup>4</sup>, Nilda del C. Sánchez <sup>5</sup>, Ayixón Sánchez-Reyes <sup>6</sup>, María del Rocío Rodríguez-Hernández <sup>1</sup>, Antonio Peña <sup>4</sup>, Olivia Sánchez <sup>4</sup>, Jesús Aguirre <sup>4</sup>, Ramón Alberto Batista-García <sup>2</sup>, Jorge Luis Folch-Mallol <sup>1</sup> and María del Rayo Sánchez-Carbente <sup>1,\*</sup>

- <sup>1</sup> Centro de Investigación en Biotecnología, Universidad Autónoma del Estado de Morelos (UAEM), Av. Universidad 1001, Col. Chamilpa, Cuernavaca C.P. 62209, Morelos, México; eyarguez2013@gmail.com (E.C.R.-P.); yordanis.perezllano@yahoo.com (Y.P.-L.); rocio.rodriguez@uaem.mx (M.d.R.R.-H.); jordi@uaem.mx (J.L.F.-M.)
  - <sup>2</sup> Centro de Investigación en Dinámica Celular, IICBA, UAEM, Av. Universidad 1001, Col. Chamilpa, Cuernavaca, C.P. 62209, Morelos, México; rabg@uaem.mx
  - <sup>3</sup> Instituto de Biotecnología, Universidad Nacional Autónoma de México (UNAM), Campus Morelos, Av. Universidad 1001, Col. Chamilpa, Cuernavaca C.P. 62210, Morelos, México; raunel@ibt.unam.mx
  - <sup>4</sup> Instituto de Fisiología Celular, UNAM, Cto. Exterior s/n, Cd. Universitaria, Coyoacán, Cd. de México C.P. 04510, México; nsanchez@ifc.unam.mx (N.S.S.); fpadilla@ifc.unam.mx (F.P.-G.); mcalahor@ifc.unam.mx (M.C.); apd@ifc.unam.mx (A.P.); asanchez@ifc.unam.mx (O.S.); jaguirre@ifc.unam.mx (J.A.)
  - <sup>5</sup> Centro de Ciencias Genómicas, UNAM, Campus Morelos, Av. Universidad 1001, Col. Chamilpa, Cuernavaca CP62210, Morelos, México; nildita1985@gmail.com
  - <sup>6</sup> Catedras Conacyt-Instituto de Biotecnología, Universidad Nacional Autónoma de México (UNAM), Campus Morelos, Av. Universidad 1001, Col. Chamilpa, Cuernavaca C.P. 62210, Morelos, México; ayixon.sanchez@ibt.unam.mx
- \* Correspondence: maria.sanchez@uaem.mx  
† These authors contributed equally to this work.

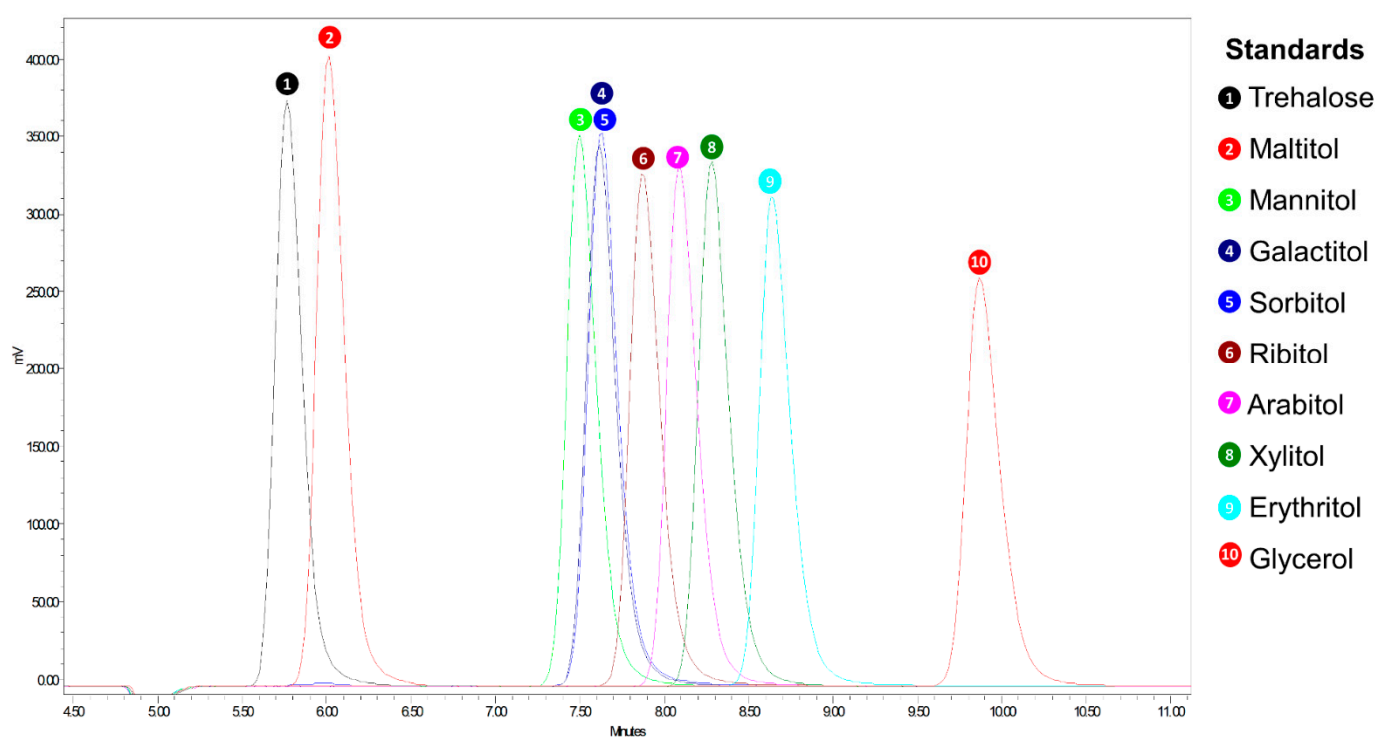

**Figure S1.** Chromatograms of all used standards. Concentration: 5 mg/mL each

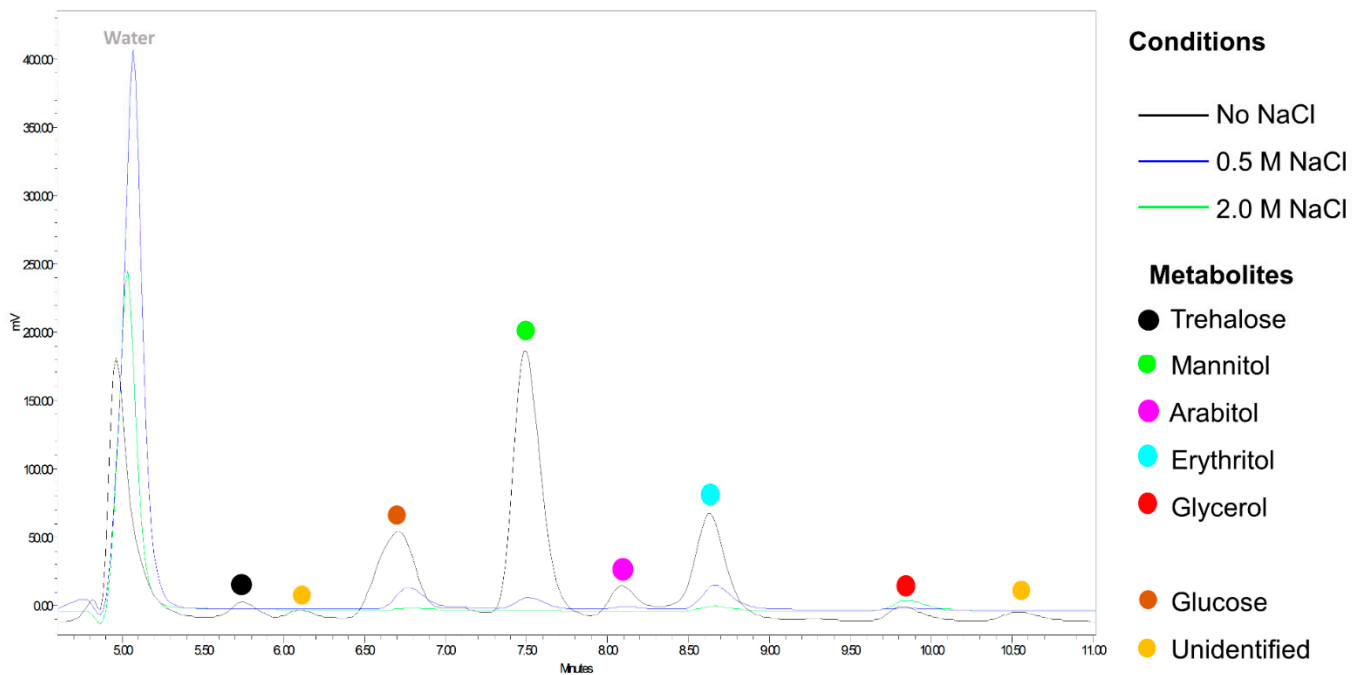

**Figure S2.** Chromatograms of selected samples from all salinity conditions. .

**Table S1.** Primer information for qPCR analysis of enzyme genes involved in the synthesis of compatible solutes.

| Metabolite | Gene         | Primer Sequence                | Genome Location            | Tm | Amp. size | Thib | Conc. | Eff. |
|------------|--------------|--------------------------------|----------------------------|----|-----------|------|-------|------|
| Trehalose  | <i>stps</i>  | Fw: TCA ACG ATG GAC CAC TT     | scaffold_10:397039-397058  | 60 | 109       | 63   | 300   | 0.92 |
|            |              | Rv: GGG TCG GAC TGC TTC GAT AT | scaffold_10:396950-396969  |    |           |      |       |      |
|            | <i>ccg-9</i> | Fw: GTC AGC CAC CCT GTG AAA AC | scaffold_3:1753499-1753518 | 60 | 84        | 65   | 300   | 1.03 |
|            |              | Rv: CAG CCA ATC TGT CGA TGC AG | scaffold_3:1753435-1753454 |    |           |      |       |      |
| Mannitol   | <i>mtld</i>  | Fw: CAT CAA CGC CAC CGA TAC AC | scaffold_5:597303-597322   | 60 | 97        | 63   | 300   | 0.92 |
|            |              | Rv: ACA TTG AGG CCG TTG TTT GG | scaffold_5:597185-597204   |    |           |      |       |      |
|            | <i>m2dh</i>  | Fw: GCA TTG TCT CGC TGA CCA TC | scaffold_3:2943327-2943346 | 60 | 128       | 63   | 300   | 1.00 |
|            |              | Rv: GGT GGT ACG GGG AGT CTT TT | scaffold_3:2943435-2943454 |    |           |      |       |      |
| Erythritol | <i>tktB</i>  | Fw: GCC ACC CAT CGC AGT ATC TA | scaffold_14:515665-515684  | 60 | 126       | 63   | 700   | 0.96 |
|            |              | Rv: TGA TAG TCT CGA CCA TGG CG | scaffold_14:515559-515578  |    |           |      |       |      |
|            | <i>tktA</i>  | Fw: TGC CTT CCA GCA GAT TCA GT | scaffold_2:2845201-2845220 | 60 | 126       | 65   | 300   | 1.09 |

|          |             |                                        |                            |    |     |    |     |      |
|----------|-------------|----------------------------------------|----------------------------|----|-----|----|-----|------|
|          | <i>tad</i>  | <b>Rv:</b> CGT ATG GCC GTT TTC CCA TC  | scaffold_2:2845095-2845114 | 60 | 100 | 65 | 300 | 0.95 |
|          |             | <b>Fw:</b> CTC ATC TCT CCC TTC GTC GG  | scaffold_2:1207666-1207685 |    |     |    |     |      |
|          |             | <b>Rv:</b> TCT GGA CAG ACT TGA CAC CG  | scaffold_2:1207746-1207765 |    |     |    |     |      |
|          |             | <b>Fw:</b> ACA GGC TCT ACC CTC TGA GT  | scaffold_2:1570111-1570130 |    |     |    |     |      |
| Glycerol | <i>gpd</i>  | <b>Rv:</b> GAG AGC GCC TCC CAA TGA TA  | scaffold_2:1570215-1570234 | 60 | 124 | 60 | 500 | 1.06 |
|          |             |                                        |                            |    |     |    |     |      |
| HOG      | <i>hog1</i> | <b>Fw:</b> GTC TTT GCC CTT CCC ATT TTC | scaffold_1:1249970-1249990 | 60 | 150 | 60 | 500 | 0.92 |
|          |             | <b>Rv:</b> GAA TTC CGC CAT TTT GAC CG  | scaffold_1:1249841-1249860 |    |     |    |     |      |
|          | <i>hog2</i> | <b>Fw:</b> CAT GAA TAC CTC GCT CCG TAC | NA                         | 60 |     | 63 | 500 | 0.96 |
|          |             | <b>Rv:</b> TCA TCT TCC AAG TAT GCA CCG | scaffold_1:4867322-4867342 |    |     |    |     |      |

**Table S2.** Growth kinetic parameters of *Aspergillus sydowii* grown at different NaCl concentrations.

| NaCl Concentration (M) | Specific Growth Rate ( $\mu$ )(h <sup>-1</sup> ) | Doubling Time (td)(h) |
|------------------------|--------------------------------------------------|-----------------------|
| No NaCl                | 0.0514                                           | 13.48                 |
| 0.5                    | 0.0683                                           | 10.14                 |
| 1.0                    | 0.0629                                           | 11.01                 |
| 2.0                    | 0.0474                                           | 14.62                 |

**Table S3.** *p* values from statistics analysis performed on experiments shown in Figure 1B. Statistical differences were evaluated by one way ANOVA with Kruskal-Wallis and Dunn's multiple comparisons test where *p* < 0.05 is statistically significant.

| Solutes    | Condition                 | <i>p</i> Value |         |         |
|------------|---------------------------|----------------|---------|---------|
|            |                           | Day 5          | Day 7   | Day 11  |
| Trehalose  | No NaCl vs. 0.5 M NaCl    | 0.5172         | 0.0504  | 0.019   |
|            | No NaCl vs. 2.0 M NaCl    | 0.5172         | 0.0504  | 0.5172  |
|            | 0.5 M NaCl vs. 2.0 M NaCl | 0.019          | >0.9999 | 0.5172  |
| Mannitol   | No NaCl vs. 0.5 M NaCl    | 0.5391         | 0.5172  | 0.5172  |
|            | No NaCl vs. 2.0 M NaCl    | 0.5391         | 0.019   | 0.019   |
|            | 0.5 M NaCl vs. 2.0 M NaCl | 0.0219         | 0.5172  | 0.5172  |
| Arabitol   | No NaCl vs. 0.5 M NaCl    | 0.5391         | 0.5172  | 0.5391  |
|            | No NaCl vs. 2.0 M NaCl    | 0.5391         | 0.5172  | 0.5391  |
|            | 0.5 M NaCl vs. 2.0 M NaCl | 0.0219         | 0.019   | 0.0219  |
| Erythritol | No NaCl vs. 0.5 M NaCl    | 0.0219         | 0.5172  | 0.5172  |
|            | No NaCl vs. 2.0 M NaCl    | 0.5391         | 0.5172  | 0.5172  |
|            | 0.5 M NaCl vs. 2.0 M NaCl | 0.5391         | 0.019   | 0.019   |
| Glycerol   | No NaCl vs. 0.5 M NaCl    | >0.9999        | >0.9999 | >0.9999 |
|            | No NaCl vs. 2.0 M NaCl    | 0.3062         | 0.0504  | 0.0504  |
|            | 0.5 M NaCl vs. 2.0 M NaCl | 0.0306         | 0.0504  | 0.0504  |

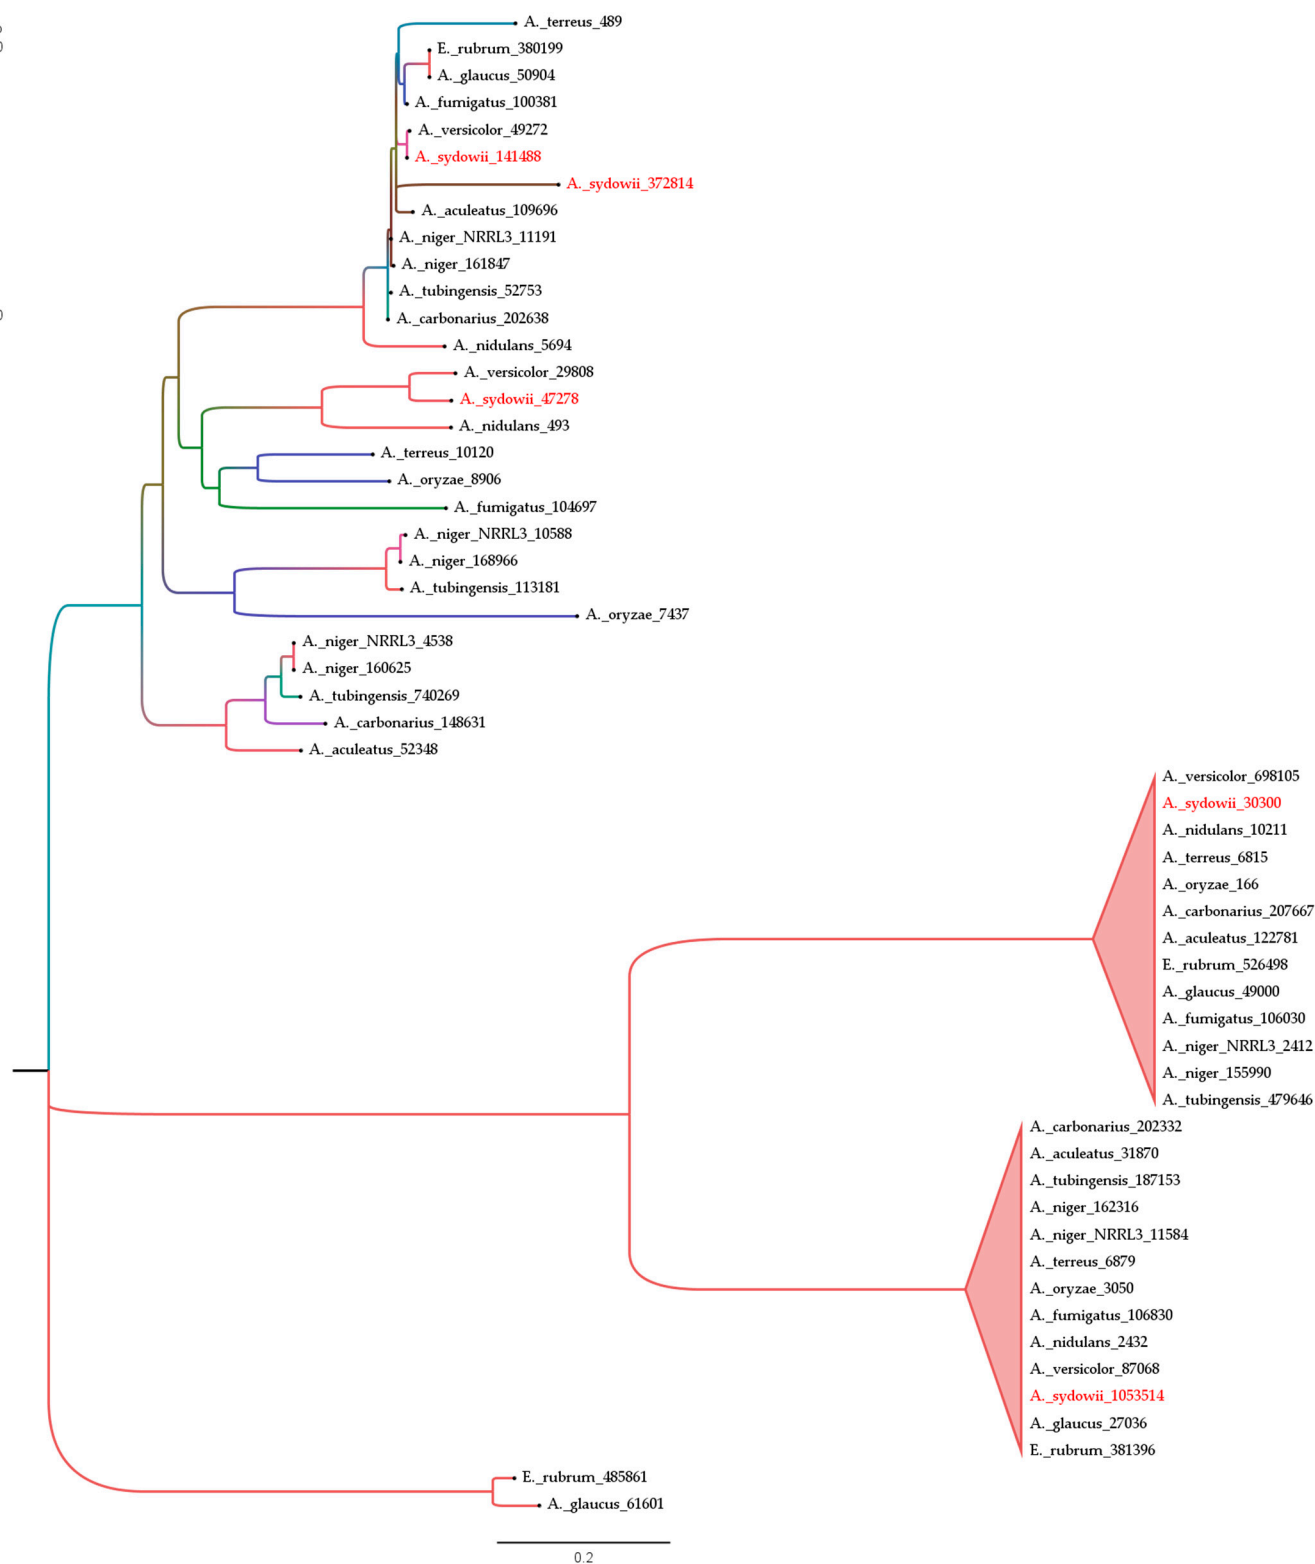

**Figure S3.** Reconstruction of MAPK phylogeny in selected *Aspergilli*, including Hog1, Hog2, and MpkC genes of *A. sydowii*.

**Table S4.** Genes encoding compatible solute synthesis enzymes in *A. nidulans* and their homologue genes of in *A. sydowii*.

| Gene                                                       | Enzyme                                     | <i>A. sydowii</i><br>Gene ID *               | Protein ID * | % Ident ** |
|------------------------------------------------------------|--------------------------------------------|----------------------------------------------|--------------|------------|
| <b>Trehalose Pathway</b>                                   |                                            |                                              |              |            |
| <i>tpsA</i>                                                | Trehalose phosphate syn-<br>thase subunit  | e_gw1.4.743.1                                | 149182       | 95         |
| <i>orlA</i>                                                | Trehalose phosphate<br>phosphatase subunit | fgenes1_pm.3_#_972                           | 56871        | 85         |
| <i>tps3</i>                                                | TPS regulatory subunit                     | fgenes1_pm.7_#_385                           | 59235        | 89         |
| <i>stps</i>                                                | Heat shock trehalose<br>phosphate synthase | fgenes1_pm.10_#_111                          | 60104        | 50         |
| <i>ccg-9</i>                                               | Trehalose phosphate syn-<br>thase          | CE565934_14846                               | 780972       | 83         |
| <i>tpg</i>                                                 | Trehalose-6-P phosphatase                  | gm1.12758_g                                  | 96075        | 87         |
| <i>treb</i>                                                | Neutral tre-halase                         | e_gw1.4.354.1                                | 149568       | 90         |
| <i>trea</i>                                                | Acid tre-halase                            | fgenes1_pm.18_#_129                          | 62558        | 84         |
| <b>Mannitol Pathway</b>                                    |                                            |                                              |              |            |
| <i>mtld</i>                                                | Mannitol-1-phosphate 5-<br>dehydrogenase   | e_gw1.5.2043.1                               | 152275       | 86         |
| <i>m2dh</i>                                                | Mannitol 2-dehydrogenase                   | fgenes1_pg.3_#_1082                          | 29920        | 84         |
| <i>mpp</i>                                                 | Manitol/Hexitol phosphatase                |                                              |              |            |
| <i>hk</i>                                                  | Hexokinase                                 |                                              |              |            |
| <b>Glycerol Pathway</b>                                    |                                            |                                              |              |            |
| <i>gpd</i>                                                 | Glycerol-3-P dehydrogenase                 | fgenes1_kg.2_#_690_#_L<br>ocus2578v1rpk69.02 | 40910        | 89         |
| <i>gpd-m</i>                                               | Glycerol-3-P dehydrogenase mitochondrial   | fgenes1_pm.1_#_8                             | 52965        | 79         |
| <i>gpp</i>                                                 | Glycerol-3-P phosphatase                   | fgenes1_kg.1_#_238_#_L<br>ocus2655v1rpk66.24 | 38002        | 91         |
| <i>gut1</i>                                                | Glycerol-kinase                            | e_gw1.4.2272.1                               | 149605       | 92         |
| <i>had1</i>                                                | Halo-acid dehalogenase                     | gm1.5577_g                                   | 88894        | 83         |
| <i>dak1</i>                                                | Dihydroxyacetone kinase                    |                                              |              |            |
| <i>gld1</i>                                                | Glycerol dehydrogenase                     | CE68380_3389                                 | 283418       | 90         |
|                                                            |                                            | fgenes1_pg.5_#_204                           | 31279        | 86         |
|                                                            |                                            | fgenes1_pm.11_#_239                          | 60569        | 56         |
| <b>Pentose phosphate pathway (Arabitol and Erythritol)</b> |                                            |                                              |              |            |
| <i>tktA</i>                                                | Transketolase                              | e_gw1.2.510.1                                | 142846       | 95         |
| <i>tktB</i>                                                | Transketolase - putative                   | gm1.10640_g                                  | 93957        | 90         |
| <i>tad</i>                                                 | Transaldolase                              | fgenes1_pm.2_#_386                           | 55064        | 94         |
| <i>larA / xylA</i>                                         | L-arabinose/D-xylose reductase             | e_gw1.2.1363.1                               | 144547       | 87         |
| <i>ardh</i>                                                | L-arabinitol dehydrogenase                 | CE897698_12019                               | 1112736      | 80         |

\* As in the sequenced genome in Mycocosm \*\* % Identity to *A. nidulans* homologue gene.

**Table S5.** *p* values obtained from statistics analysis performed on experiments shown in Figure 4. (*p* < 0.05 is statistically significant, one-way ANOVA and Dunnett's multiple comparison test).

| Solutes    | Condition        | <i>p</i> Value        |                       |                       |                         |                        |                          |
|------------|------------------|-----------------------|-----------------------|-----------------------|-------------------------|------------------------|--------------------------|
|            |                  | No NaCl-<br>0.5M NaCl | No NaCl-<br>2.0M NaCl | 2.0M NaCl-<br>No NaCl | 2.0M NaCl-<br>0.5M NaCl | 0.5 M NaCl-<br>No NaCl | 0.5 M NaCl-<br>2.0M NaCl |
| Trehalose  | 0 min vs. 10 min | 0.9484                | <0.0001               | <0.0001               | 0.6028                  | 0.9998                 | <0.0001                  |
|            | 0 min vs. 30 min | 0.9929                | <0.0001               | <0.0001               | 0.3974                  | 0.993                  | <0.0001                  |
|            | 0 min vs. 2 h    | 0.417                 | <0.0001               | <0.0001               | 0.2554                  | 0.7194                 | <0.0001                  |
|            | 0 min vs. 8 h    | 0.6234                | <0.0001               | <0.0001               | 0.1114                  | 0.1675                 | <0.0001                  |
|            | 0 min vs. 24 h   | 0.397                 | <0.0001               | <0.0001               | 0.237                   | <0.0001                | <0.0001                  |
|            | 0 min vs. 48 h   | 0.8485                | <0.0001               | <0.0001               | <0.0001                 | 0.9925                 | <0.0001                  |
| Mannitol   | 0 min vs. 10 min | 0.0045                | <0.0001               | 0.0004                | >0.9999                 | 0.9997                 | <0.0001                  |
|            | 0 min vs. 30 min | <0.0001               | <0.0001               | <0.0001               | >0.9999                 | 0.9996                 | <0.0001                  |
|            | 0 min vs. 2 h    | <0.0001               | <0.0001               | 0.0021                | >0.9999                 | <0.0001                | <0.0001                  |
|            | 0 min vs. 8 h    | <0.0001               | <0.0001               | <0.0001               | <0.0001                 | <0.0001                | <0.0001                  |
|            | 0 min vs. 24 h   | <0.0001               | <0.0001               | <0.0001               | <0.0001                 | 0.0004                 | <0.0001                  |
|            | 0 min vs. 48 h   | <0.0001               | <0.0001               | <0.0001               | >0.9999                 | 0.0002                 | <0.0001                  |
| Arabitol   | 0 min vs. 10 min | 0.4791                | <0.0001               | <0.0001               | >0.9999                 | 0.7318                 | <0.0001                  |
|            | 0 min vs. 30 min | 0.0148                | <0.0001               | 0.47                  | >0.9999                 | 0.9997                 | <0.0001                  |
|            | 0 min vs. 2 h    | <0.0001               | <0.0001               | >0.9999               | >0.9999                 | <0.0001                | <0.0001                  |
|            | 0 min vs. 8 h    | 0.0052                | <0.0001               | 0.0065                | <0.0001                 | 0.0327                 | <0.0001                  |
|            | 0 min vs. 24 h   | 0.8105                | <0.0001               | <0.0001               | <0.0001                 | 0.0857                 | <0.0001                  |
|            | 0 min vs. 48 h   | <0.0001               | <0.0001               | <0.0001               | >0.9999                 | 0.2647                 | <0.0001                  |
| Erythritol | 0 min vs. 10 min | 0.1093                | <0.0001               | <0.0001               | 0.0001                  | 0.7                    | <0.0001                  |
|            | 0 min vs. 30 min | 0.0471                | 0.0354                | <0.0001               | <0.0001                 | 0.9997                 | <0.0001                  |
|            | 0 min vs. 2 h    | <0.0001               | 0.9979                | <0.0001               | <0.0001                 | 0.9997                 | <0.0001                  |
|            | 0 min vs. 8 h    | 0.0039                | <0.0001               | <0.0001               | 0.3936                  | <0.0001                | <0.0001                  |
|            | 0 min vs. 24 h   | <0.0001               | 0.0149                | 0.0022                | <0.0001                 | 0.0001                 | <0.0001                  |
|            | 0 min vs. 48 h   | <0.0001               | <0.0001               | <0.0001               | <0.0001                 | <0.0001                | <0.0001                  |
| Glycerol   | 0 min vs. 10 min |                       | >0.9999               | <0.0001               | <0.0001                 | >0.9999                | >0.9999                  |
|            | 0 min vs. 30 min |                       | >0.9999               | <0.0001               | <0.0001                 | >0.9999                | >0.9999                  |
|            | 0 min vs. 2 h    |                       | >0.9999               | <0.0001               | <0.0001                 | >0.9999                | <0.0001                  |
|            | 0 min vs. 8 h    |                       | <0.0001               | <0.0001               | <0.0001                 | <0.0001                | <0.0001                  |
|            | 0 min vs. 24 h   |                       | <0.0001               | <0.0001               | <0.0001                 | 0.0005                 | <0.0001                  |
|            | 0 min vs. 48 h   |                       | <0.0001               | <0.0001               | <0.0001                 | 0.0011                 | <0.0001                  |

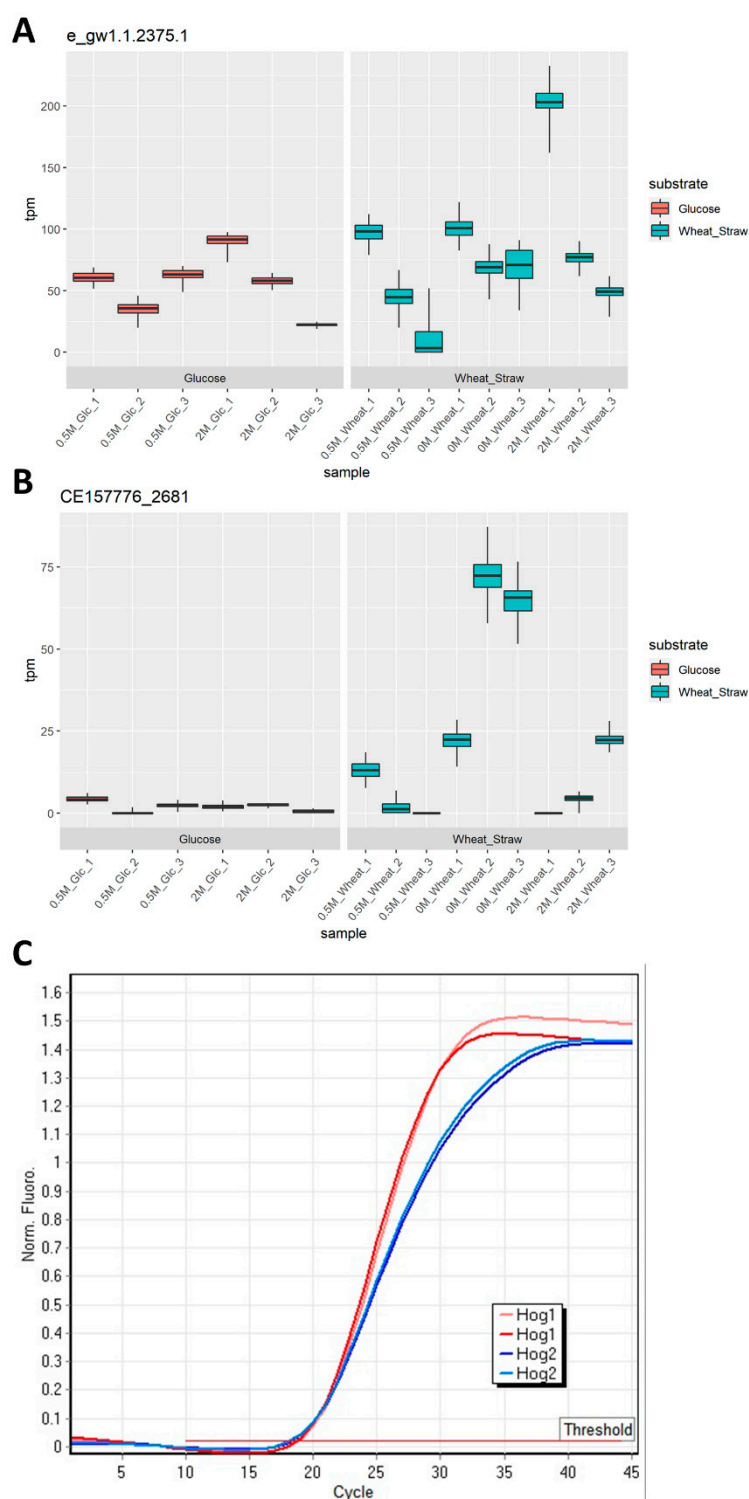

**Figure S4.** Expression levels of *hog1* and *hog2* genes. Expression of *hog1* (A) and *hog2* (B) genes measured by RNA-Scheme 1. Amplification curves examples of *hog1* and *hog2* (C); (red, C<sub>q</sub> = 18.8) and *Hog2* (blue, C<sub>q</sub> = 18.3) measured by qPCR in a pooled cDNA sample from all tested conditions (0 M, 0.5 M, and 2.0 M NaCl);.

**Table S6.** *p* values obtained in the statistics analysis performed on experiments shown in Figure 8.

| Oxidative Markers | Condition                 | <i>p</i> Value |        |        |
|-------------------|---------------------------|----------------|--------|--------|
|                   |                           | Day 5          | Day 7  | Day 11 |
| SOD               | No NaCl vs. 0.5 M NaCl    | 0.7352         | 0.1955 | 0.0518 |
|                   | No NaCl vs. 2.0 M NaCl    | 0.0708         | 0.0108 | 0.1890 |
|                   | 0.5 M NaCl vs. 2.0 M NaCl | 0.0425         | 0.0050 | 0.0186 |
| GSH               | No NaCl vs. 0.5 M NaCl    | 0.3008         | 0.9327 | 0.5803 |
|                   | No NaCl vs. 2.0 M NaCl    | 0.1212         | 0.4840 | 0.1567 |
|                   | 0.5 M NaCl vs. 2.0 M NaCl | 0.0288         | 0.5106 | 0.0429 |
| MDA               | No NaCl vs. 0.5 M NaCl    | 0.9049         | 0.0587 | 0.4844 |
|                   | No NaCl vs. 2.0 M NaCl    | 0.3419         | 0.0029 | 0.9782 |
|                   | 0.5 M NaCl vs. 2.0 M NaCl | 0.0504         | 0.5400 | 0.2067 |
| PAOP              | No NaCl vs. 0.5 M NaCl    | N/A            | N/A    | N/A    |
|                   | No NaCl vs. 2.0 M NaCl    | N/A            | N/A    | N/A    |
|                   | 0.5 M NaCl vs. 2.0 M NaCl | N/A            | N/A    | N/A    |

**Table S7.** Statistics analysis performed on experiments shown in Figure 9.

| Condition                 | SOD     | GSH     | HPO     | <i>p</i> Value     |         |         |
|---------------------------|---------|---------|---------|--------------------|---------|---------|
|                           |         |         |         | Lipid Peroxidation | MDA     | PAOP    |
| No NaCl >>> 0.5 M NaCl    |         |         |         |                    |         |         |
| 0 min. vs. 30 min.        | 0.9638  | 0.9807  | 0.9989  | 0.9763             | <0.0001 | >0.999  |
| 0 min. vs. 2 h            | 0.1319  | *0.0061 | 0.9989  | 0.3731             | *0.0184 | >0.9999 |
| 0 min. vs. 8 h            | *0.0225 | 0.9261  | 0.9989  | 0.9763             | 0.1502  | >0.9999 |
| No NaCl >>> 2.0 M NaCl    |         |         |         |                    |         |         |
| 0 min. vs. 30 min.        | *0.0317 | 0.9649  | 0.8895  | 0.4522             | *0.0002 | *0.0003 |
| 0 min. vs. 2 h            | *0.034  | 0.9739  | 0.9986  | 0.9958             | *0.0042 | <0.000  |
| 0 min. vs. 8 h            | <0.0001 | 0.8172  | >0.9999 | 0.0898             | 0.9445  | *0.0012 |
| 2.0 M NaCl >>> No NaCl    |         |         |         |                    |         |         |
| 0 min. vs. 30 min.        | 0.2782  | *0.035  | <0.0001 | 0.4448             | <0.0001 | 0.8622  |
| 0 min. vs. 2 h            | 0.114   | 0.9903  | *0.0016 | *0.0003            | 0.2527  | 0.8622  |
| 0 min. vs. 8 h            | *0.0038 | <0.0001 | *0.032  | 0.9593             | >0.9999 | 0.4226  |
| 2.0 M NaCl >>> 0.5 M NaCl |         |         |         |                    |         |         |
| 0 min. vs. 30 min.        | 0.499   | *0.0005 | <0.0001 | 0.9558             | <0.0001 | 0.8519  |
| 0 min. vs. 2 h            | 0.8543  | 0.5544  | *0.0002 | *0.0021            | 0.9834  | 0.5478  |
| 0 min. vs. 8 h            | *0.0001 | *0.0016 | 0.8085  | 0.9996             | 0.9626  | 0.2454  |
| 0.5 M NaCl >>> No NaCl    |         |         |         |                    |         |         |
| 0 min. vs. 30 min.        | *0.0002 | 0.7412  | 0.998   | 0.9782             | <0.0001 | >0.9999 |
| 0 min. vs. 2 h            | *0.0026 | 0.9923  | 0.9859  | 0.4957             | 0.9605  | 0.9996  |
| 0 min. vs. 8 h            | 0.0835  | 0.6404  | 0.3535  | *0.0373            | *0.006  | *0.0005 |
| 0.5 M NaCl >>> 2.0 M NaCl |         |         |         |                    |         |         |
| 0 min. vs. 30 min.        | 0.9434  | >0.9999 | <0.0001 | *0.0201            | <0.0001 | 0.0128  |
| 0 min. vs. 2 h            | 0.9993  | 0.9996  | *0.0015 | 0.8123             | <0.0001 | 0.0672  |
| 0 min. vs. 8 h            | 0.9991  | 0.9797  | <0.0001 | 0.0898             | 0.1462  | 0.1118  |

\* *p* < 0.05 is statistically significant using a two-way ANOVA and Dunnett's multiple comparison test.
